# Supplementary material for: Shape-controlled synthesis of phosphor K2SiF6:Mn4+nanorods and their luminescence properties
Source: Royal Society of Chemistry journal article supplement (doi:10.1039/c4ce01907e), 2014-11-26
Supplement: c4ce01907e1.pdf [file c4ce01907e1.pdf]

*Supporting information:*

**Shape-controlled synthesis of  $\text{K}_2\text{SiF}_6:\text{Mn}^{4+}$  nanorods  
phosphor and luminescent properties**

Xiaoqing Li,<sup>#a</sup> Xiangming Su,<sup>#a</sup> Pin Liu,<sup>#a</sup> Jie Liu,<sup>\*a</sup> Zhiling Yao,<sup>a</sup> Jiajun Chen,<sup>a</sup> Hui Yao,<sup>a</sup> Xibin Yu,<sup>\*a</sup> Ming Zhan<sup>\*b</sup>

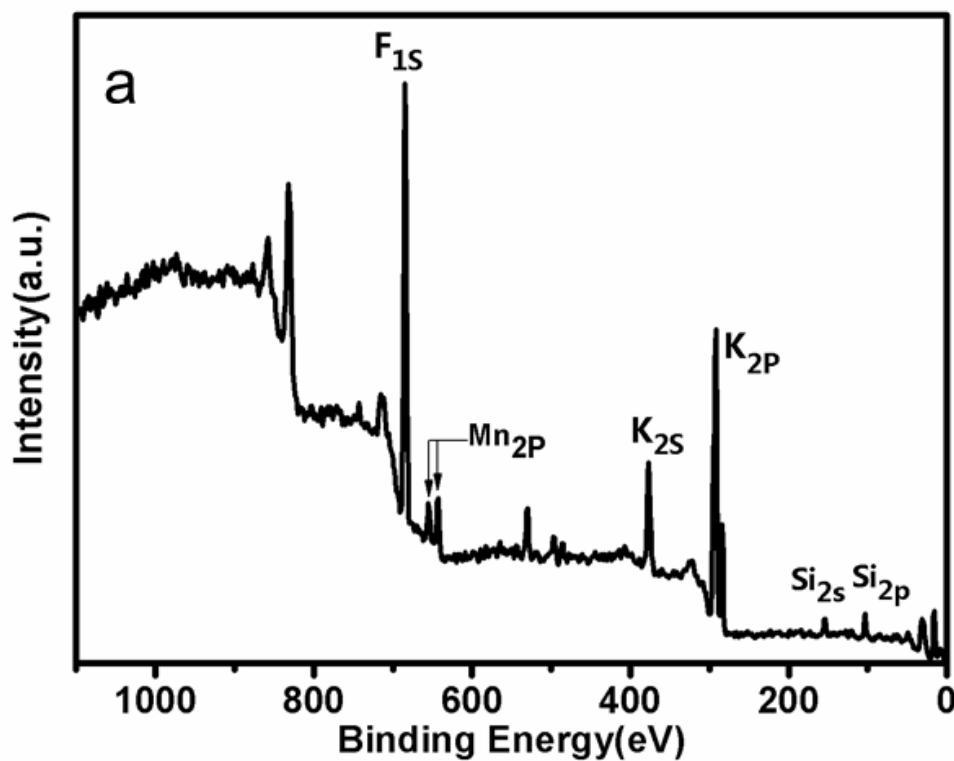

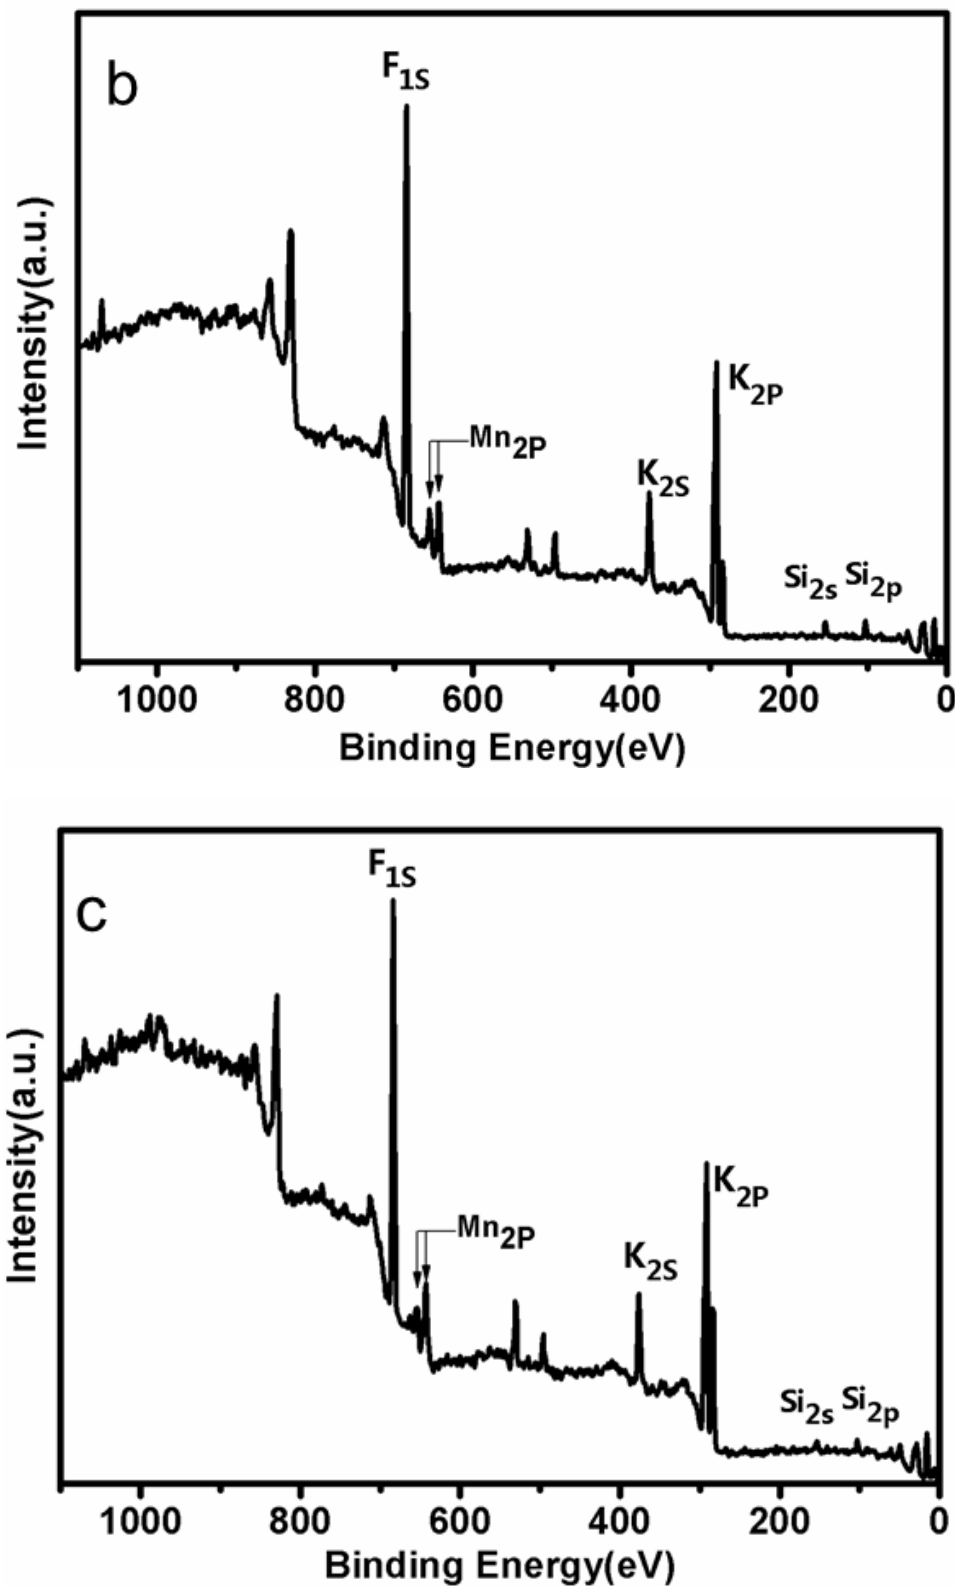

**Figure S1.** XPS survey spectra of  $K_2SiF_6:Mn^{4+}$  obtained in different shapes at various KOH/oleic acid quality ratios (a) 0.5: 1 (b) 1.2:1 and (c) 2.5:1.  $SiO_2$  spheres/ $KMnO_4$  molar ratio and reaction time are kept constant at 1:10, 30 min, respectively.
